# Supplementary material for: Genomic insights into temperature-dependent transcriptional responses of Kosmotoga olearia, a deep-biosphere bacterium that can grow from 20 to 79 °C
Source: PubMed Central journal article supplement (PMC5674127; doi:10.1007/s00792-017-0956-9), 2017-09-11

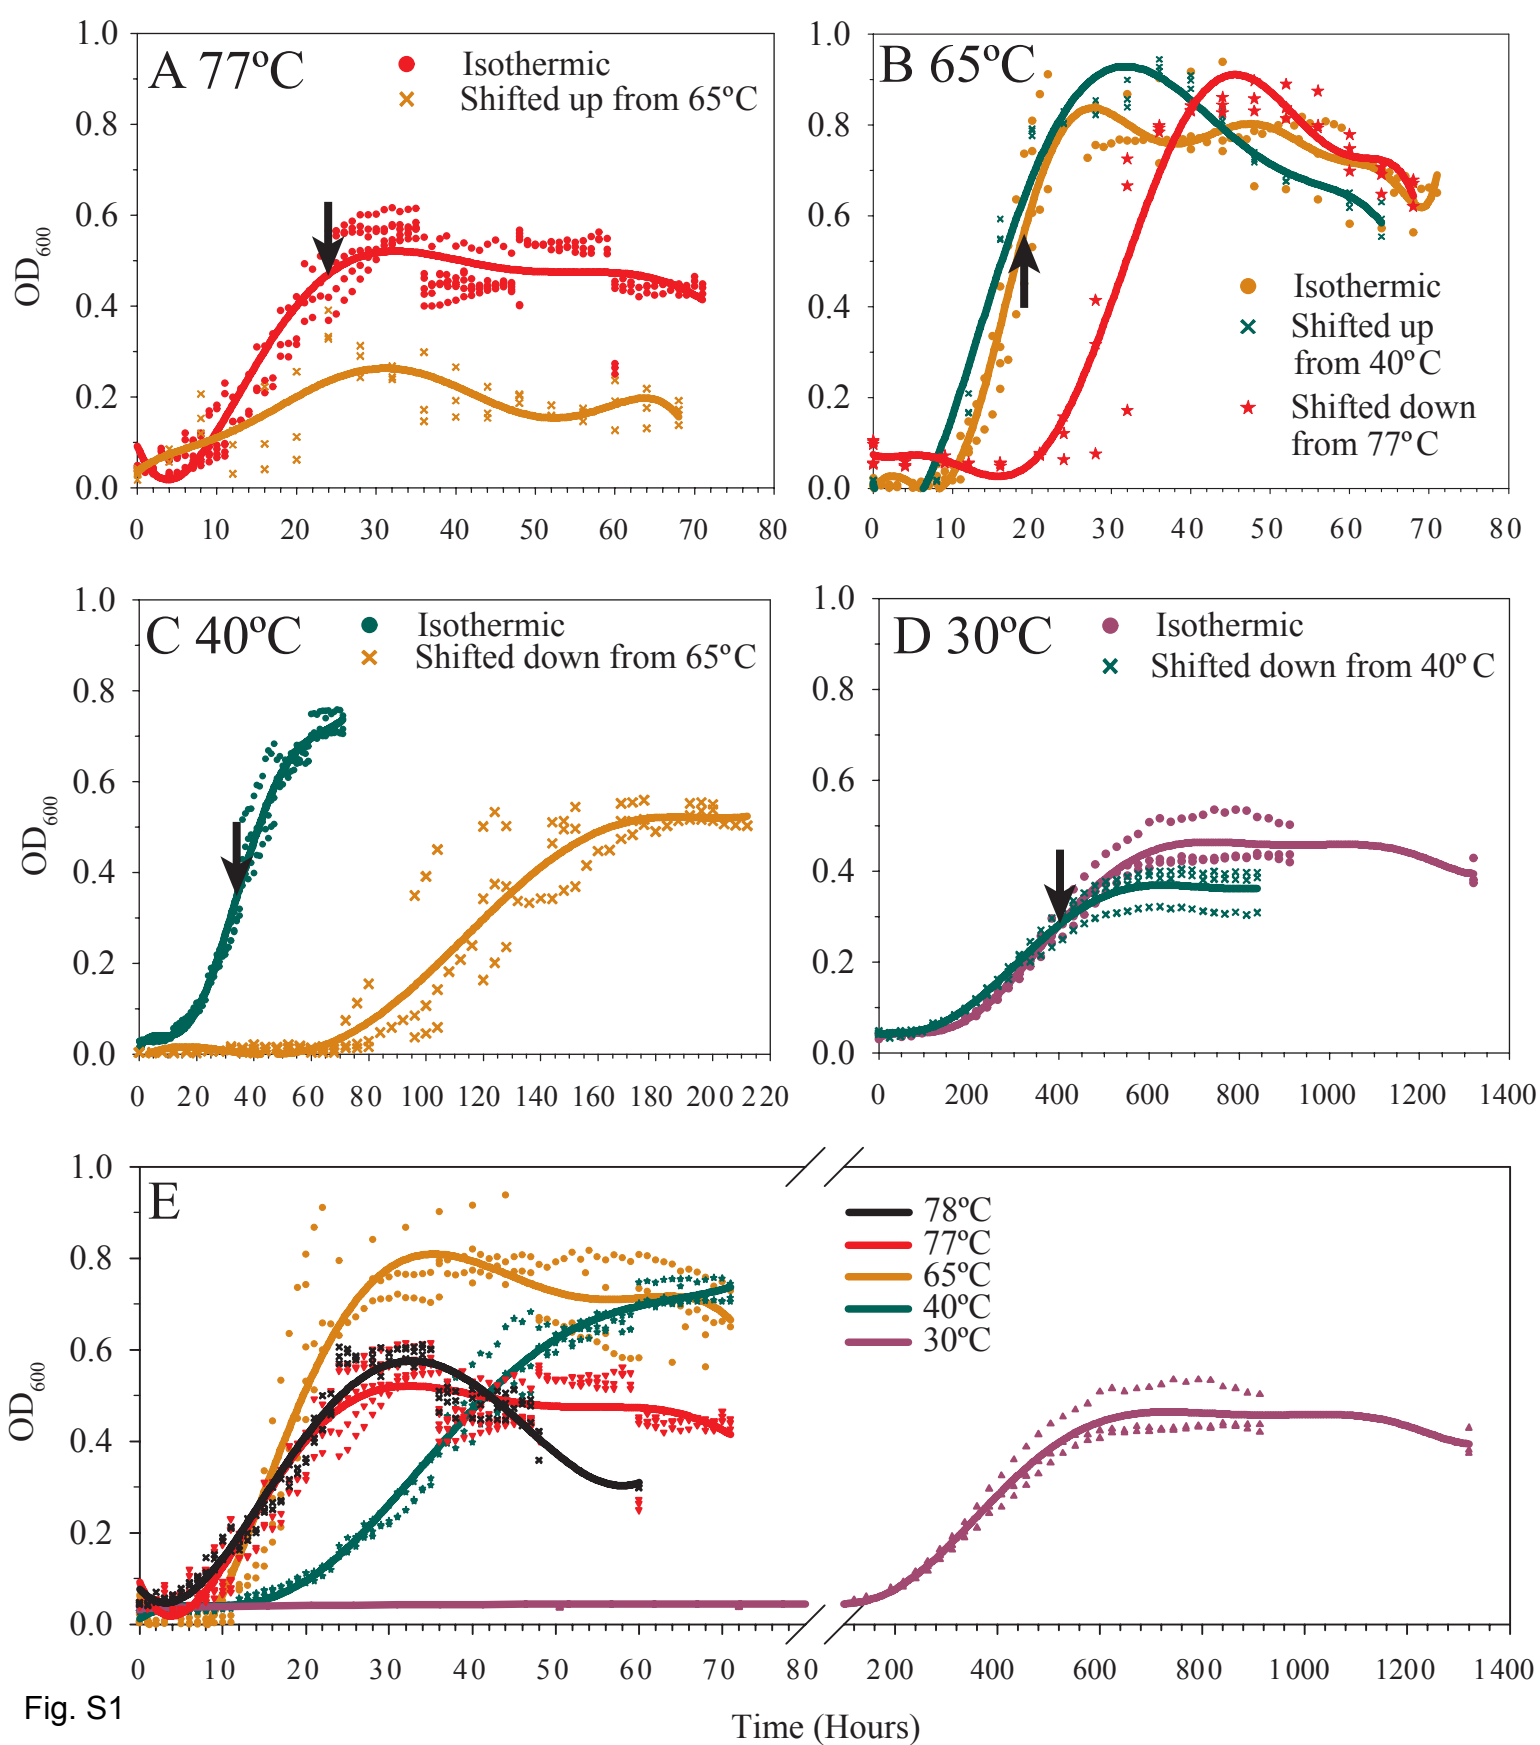

Fig. S1



Fig S2b

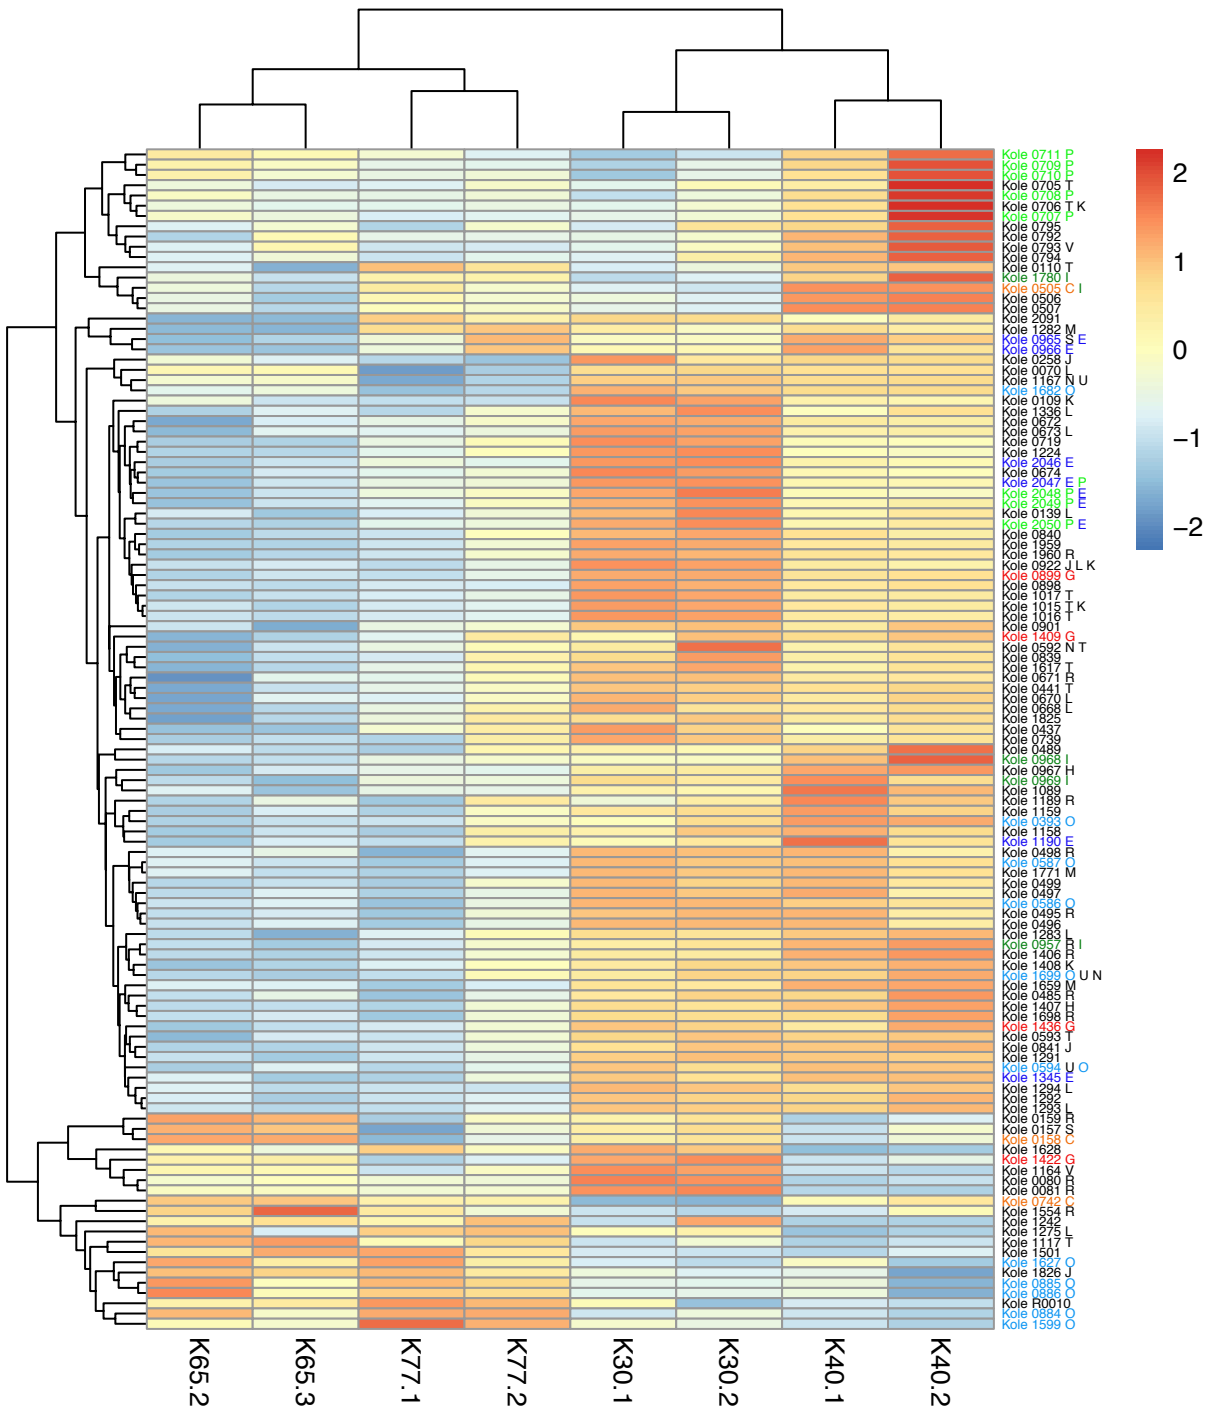

Fig. S2c

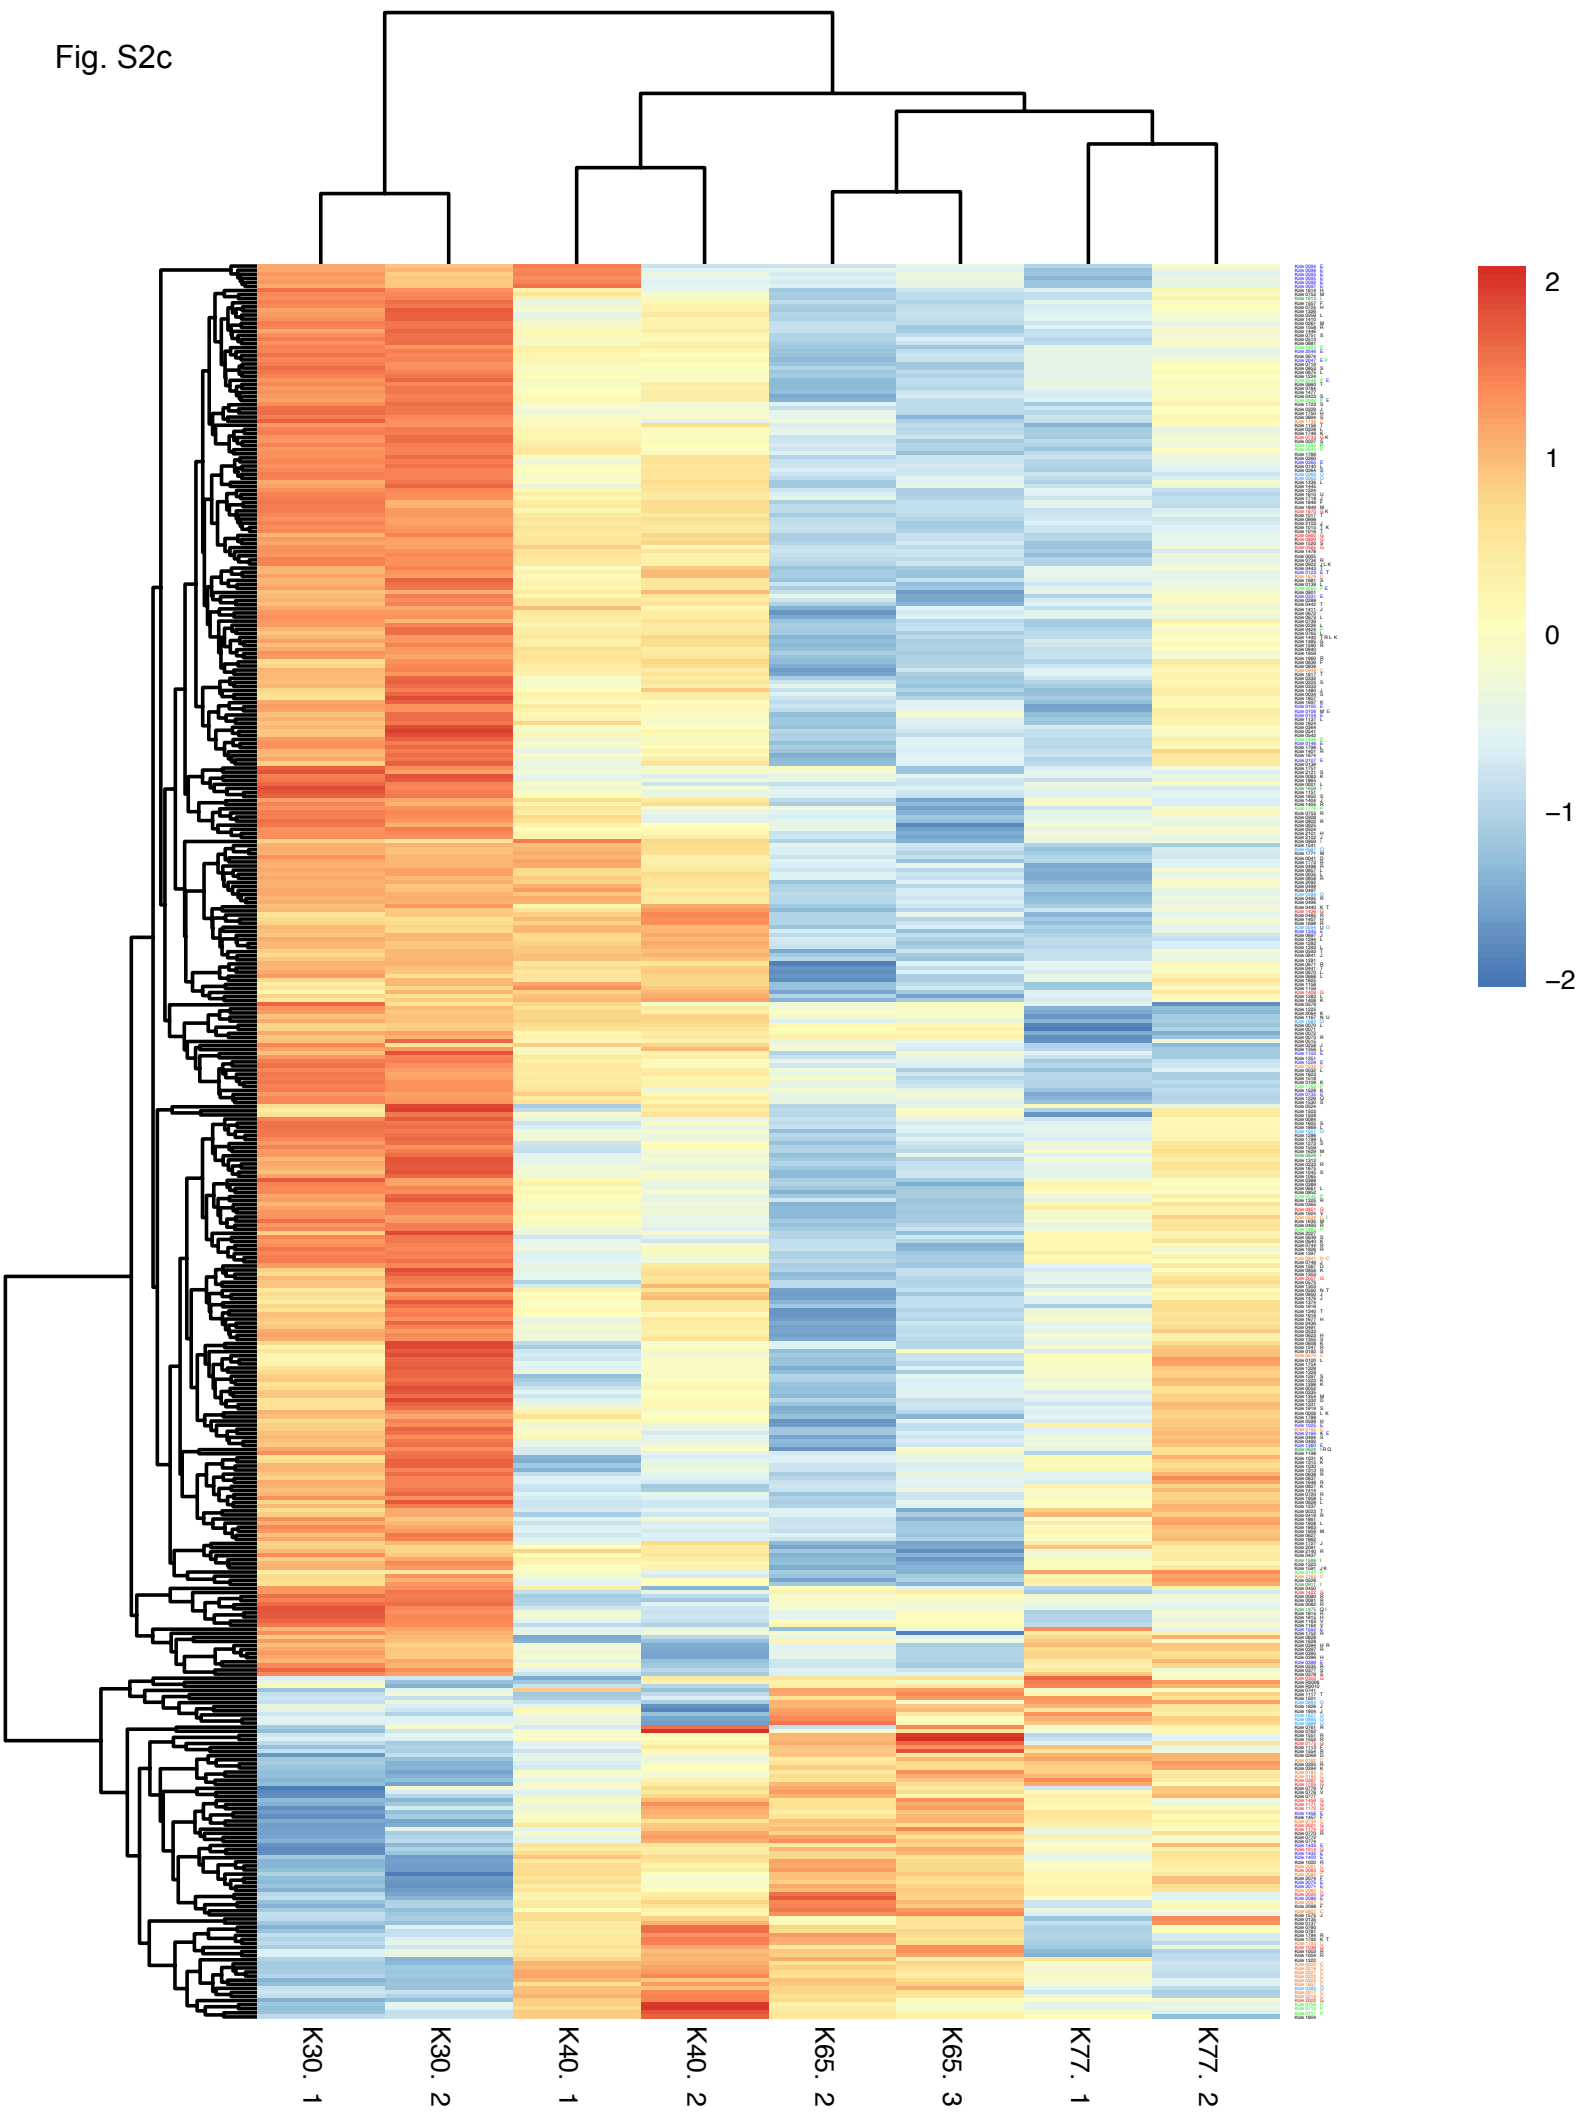

Fig. S2d

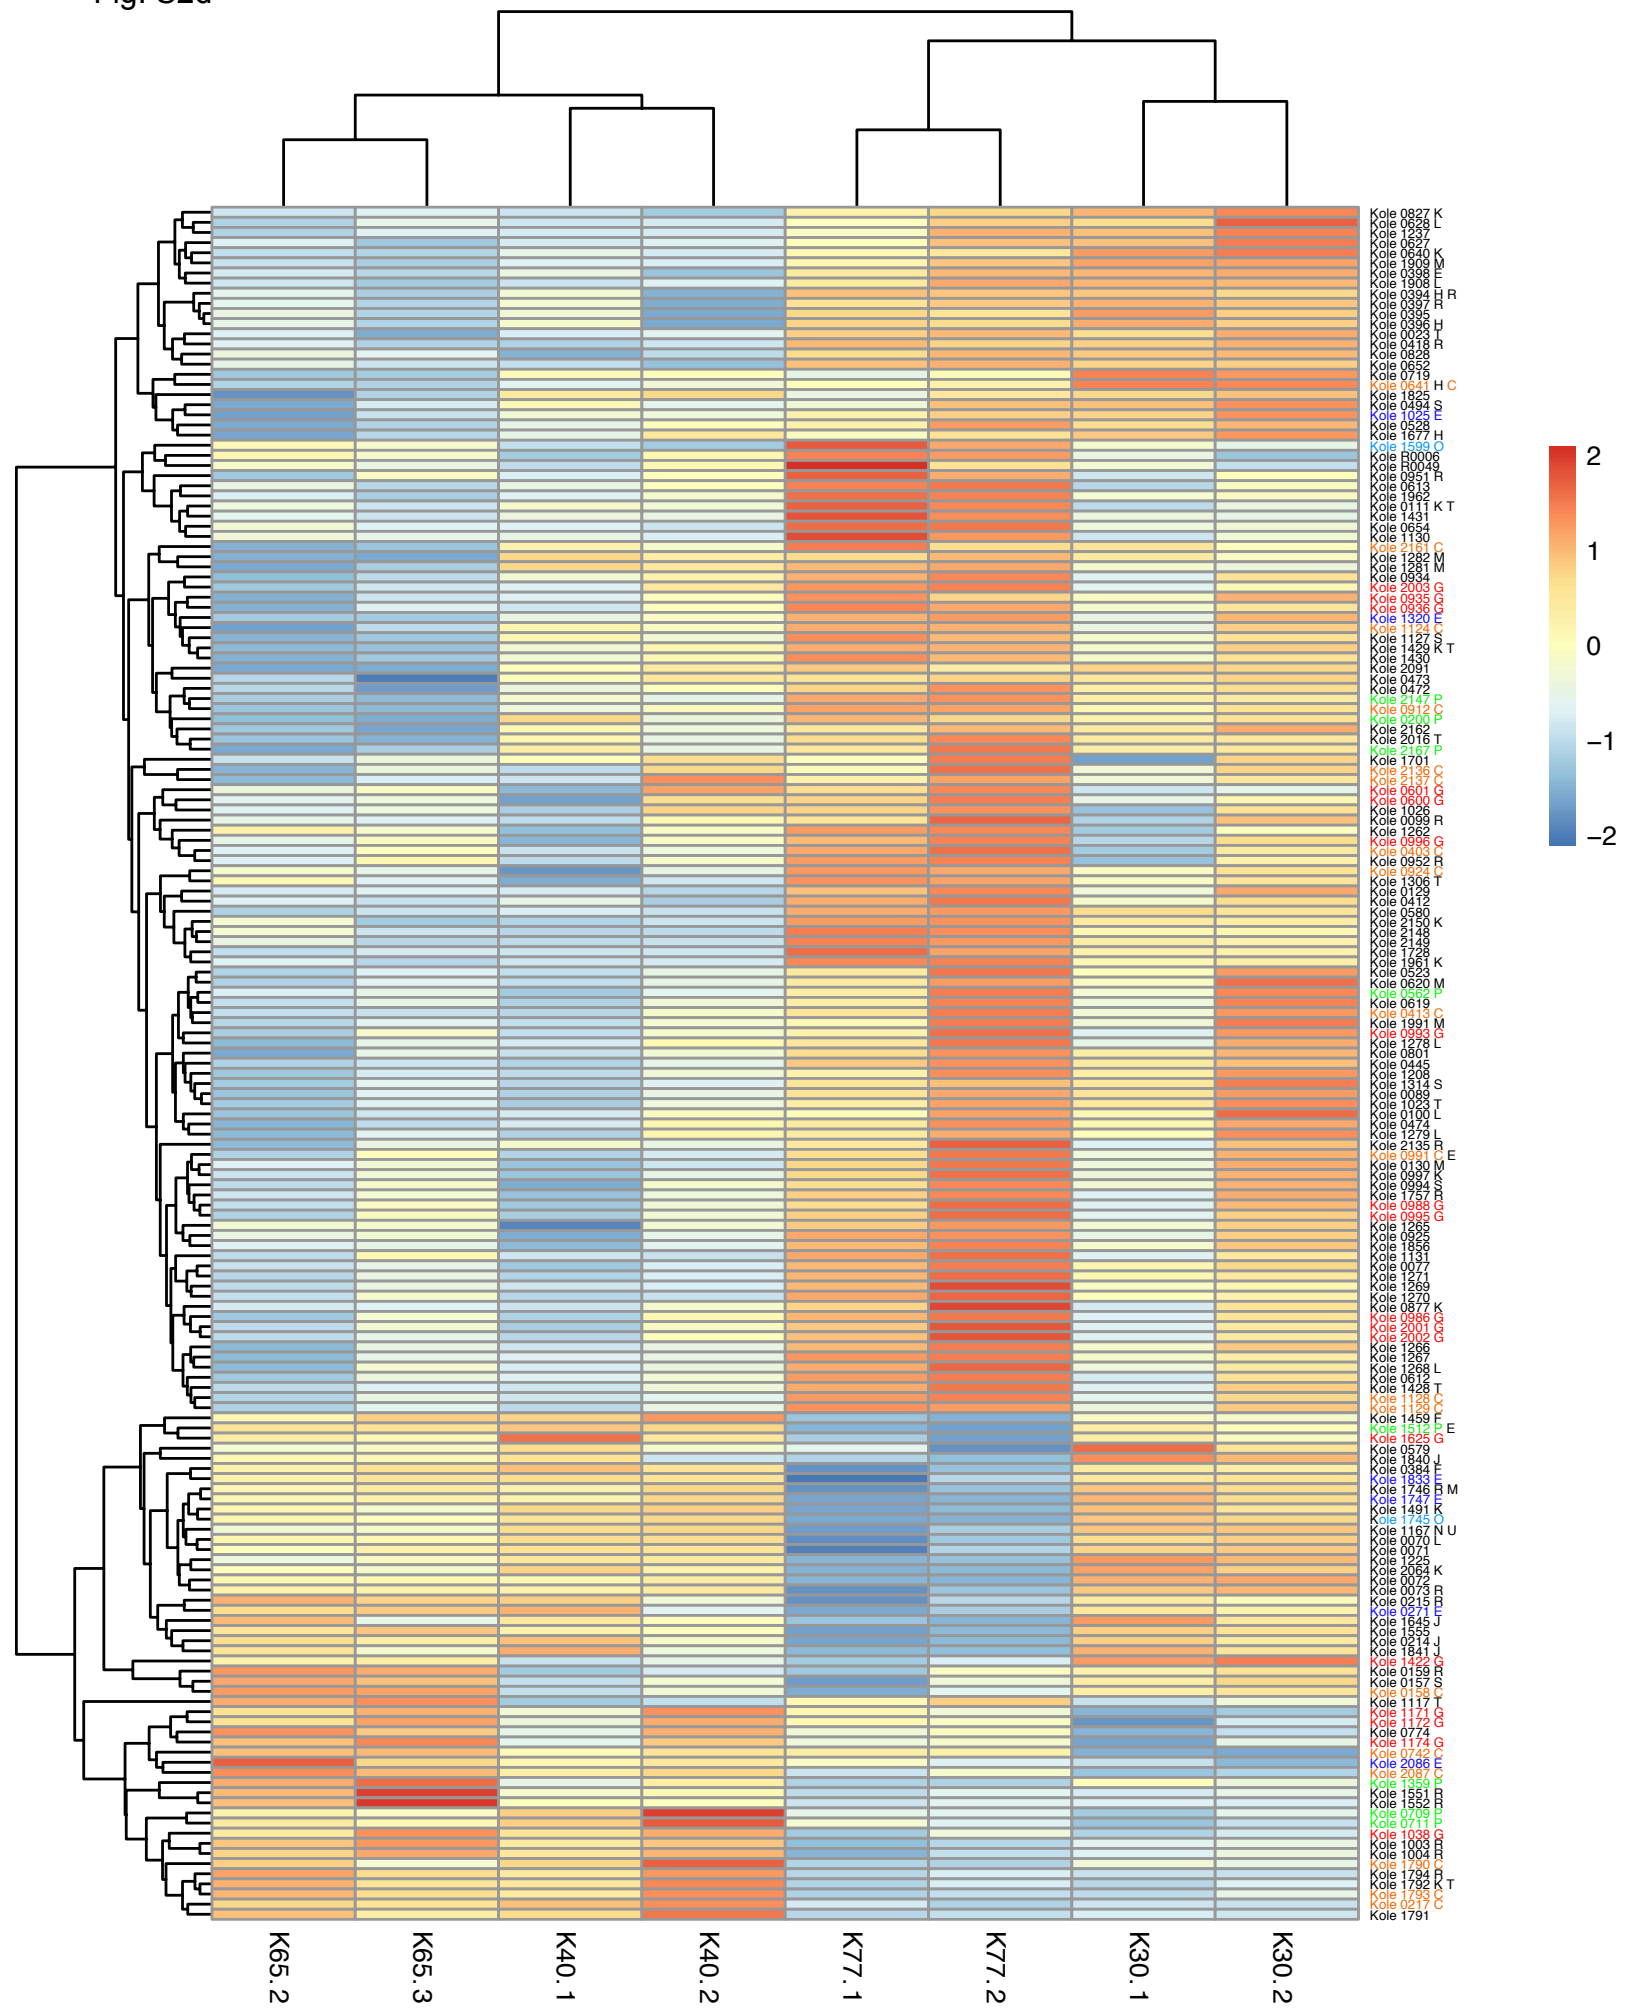

Fig. S3a

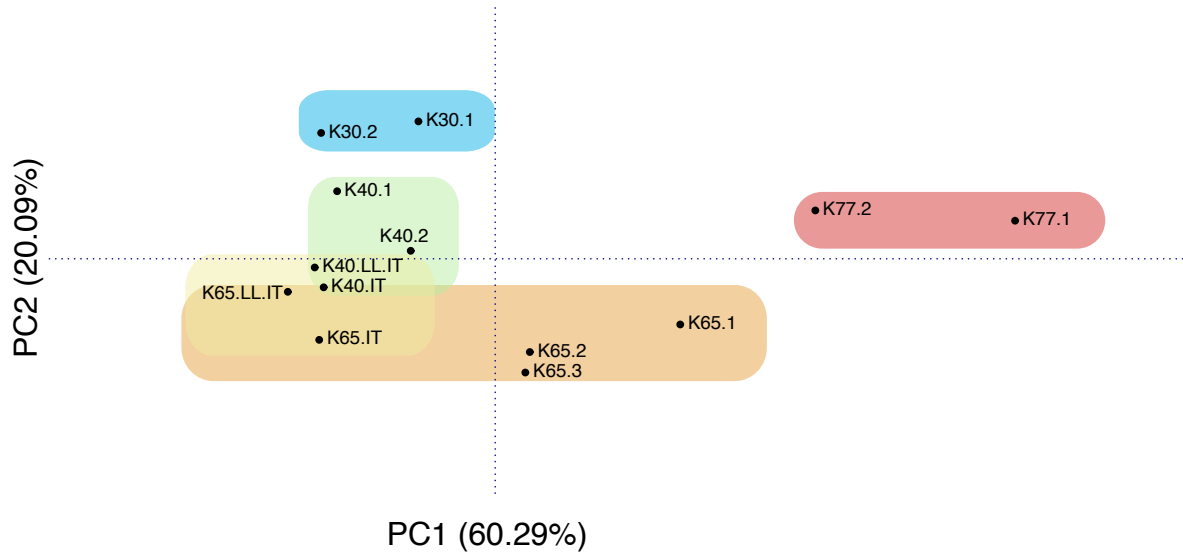

Fig. S3b

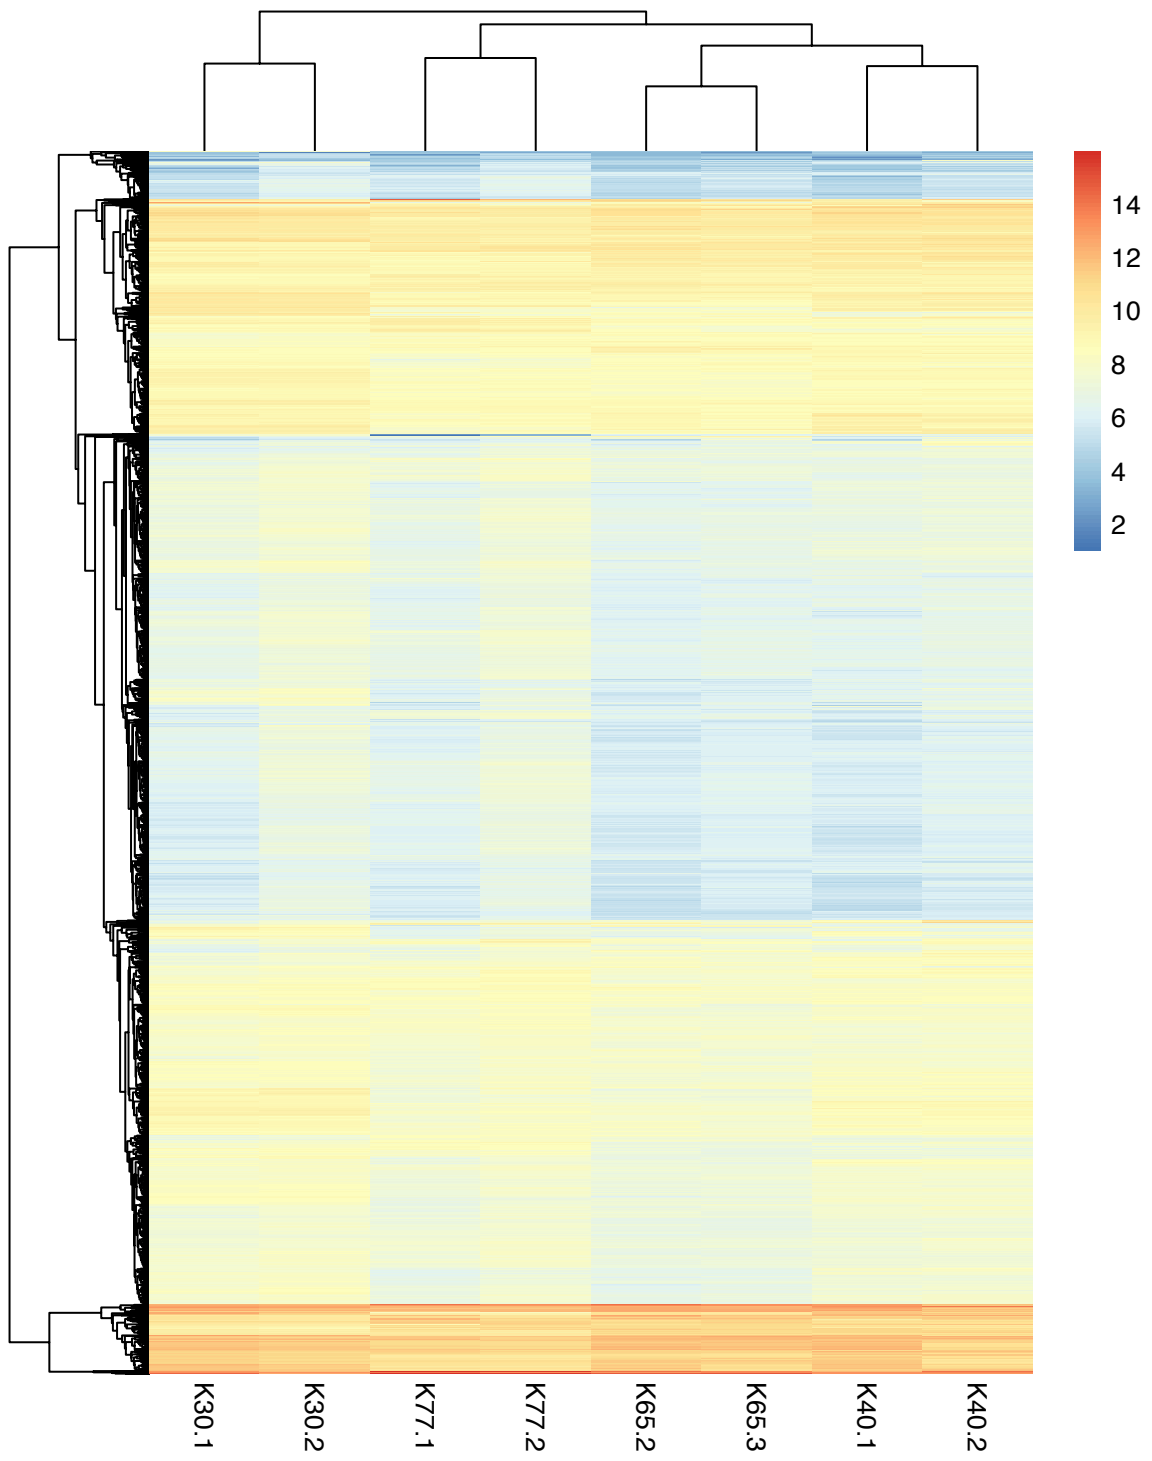

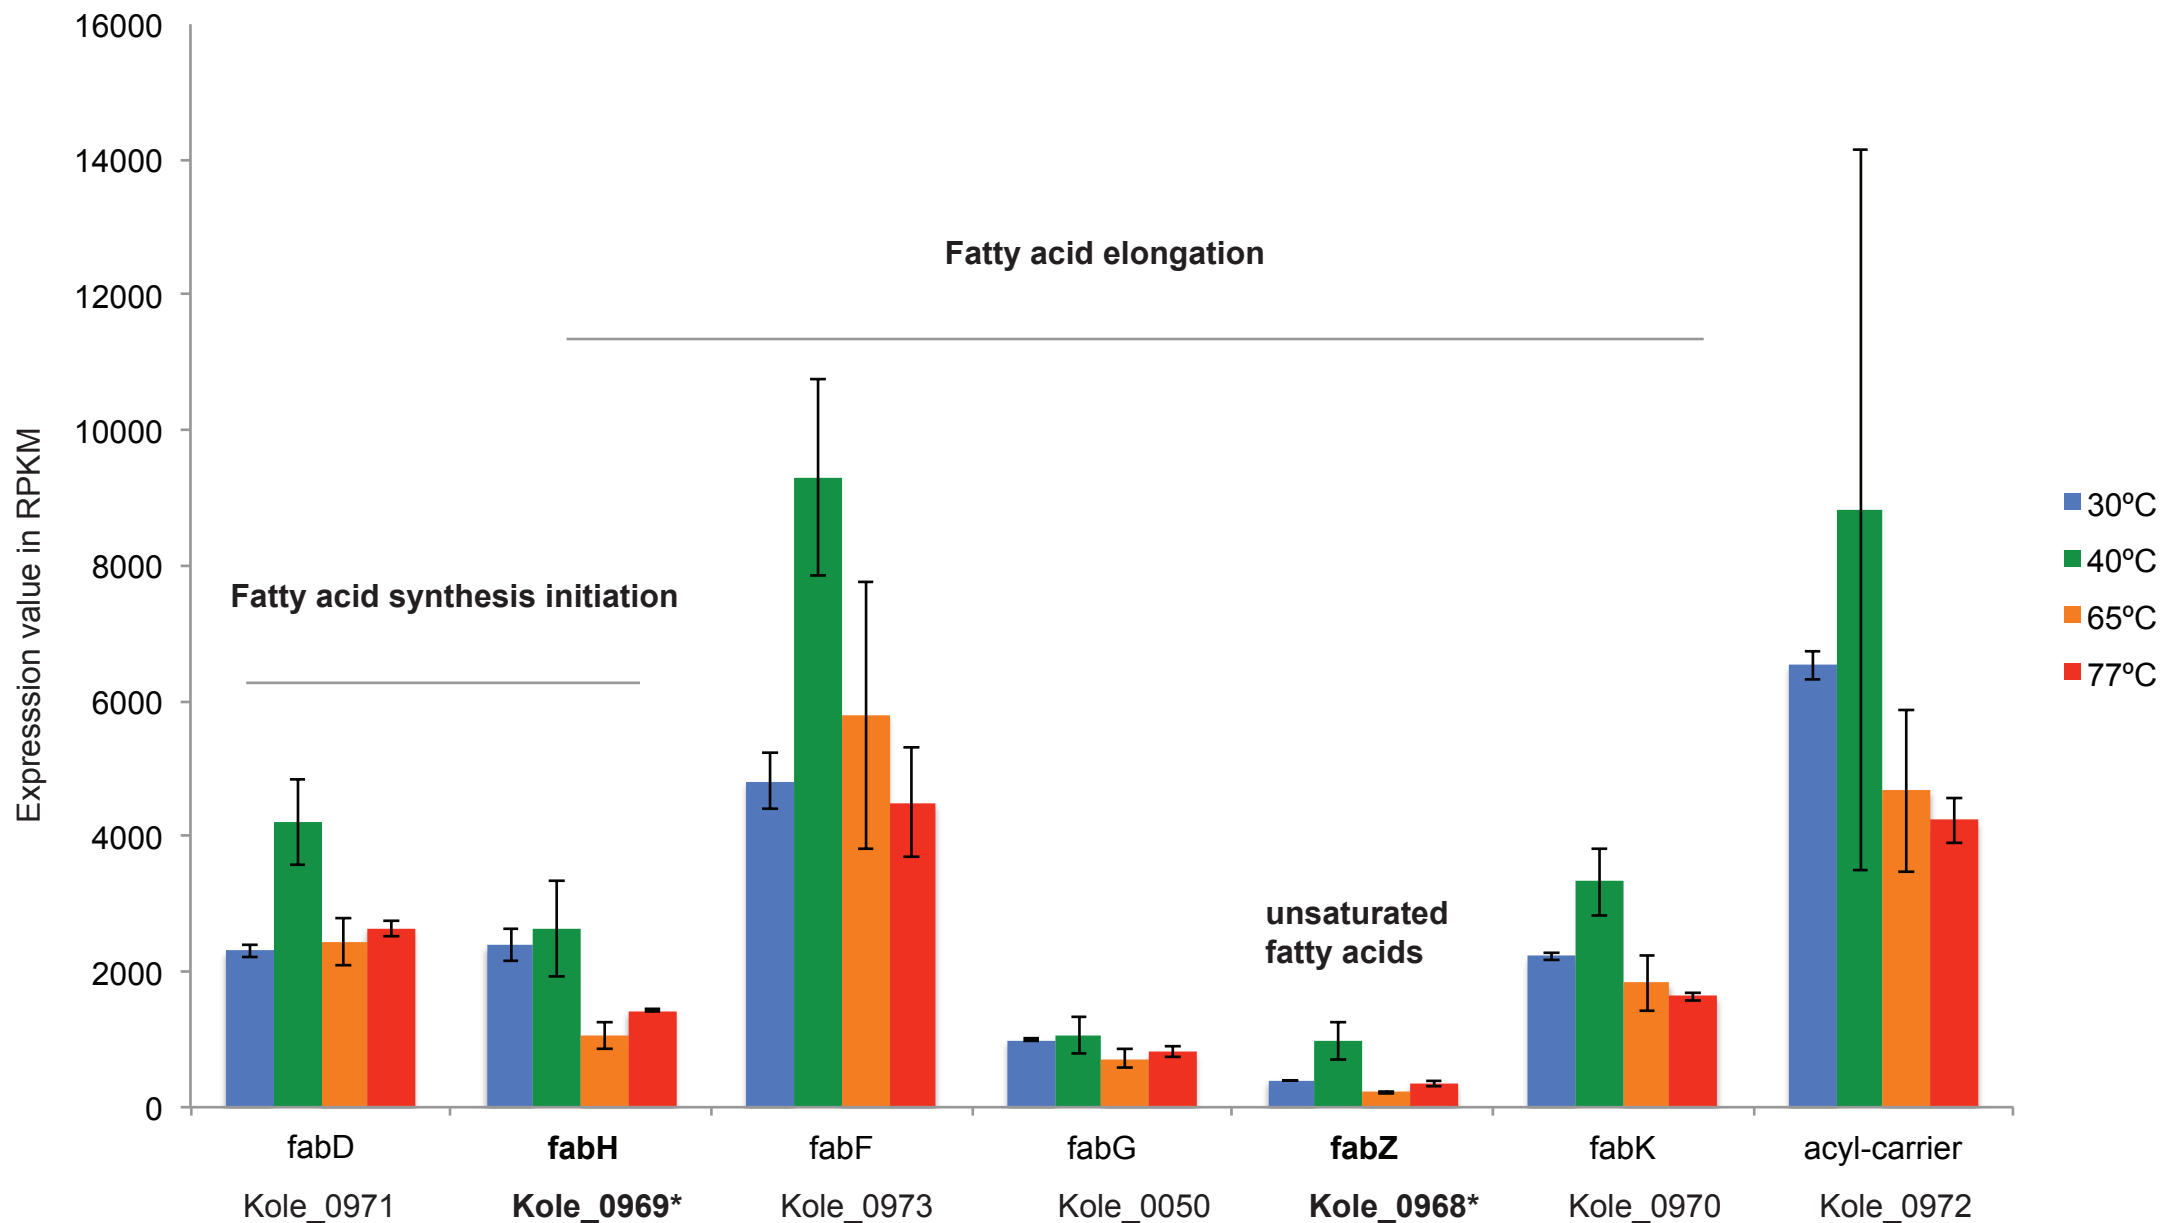

Fig. S4



Fig. S5

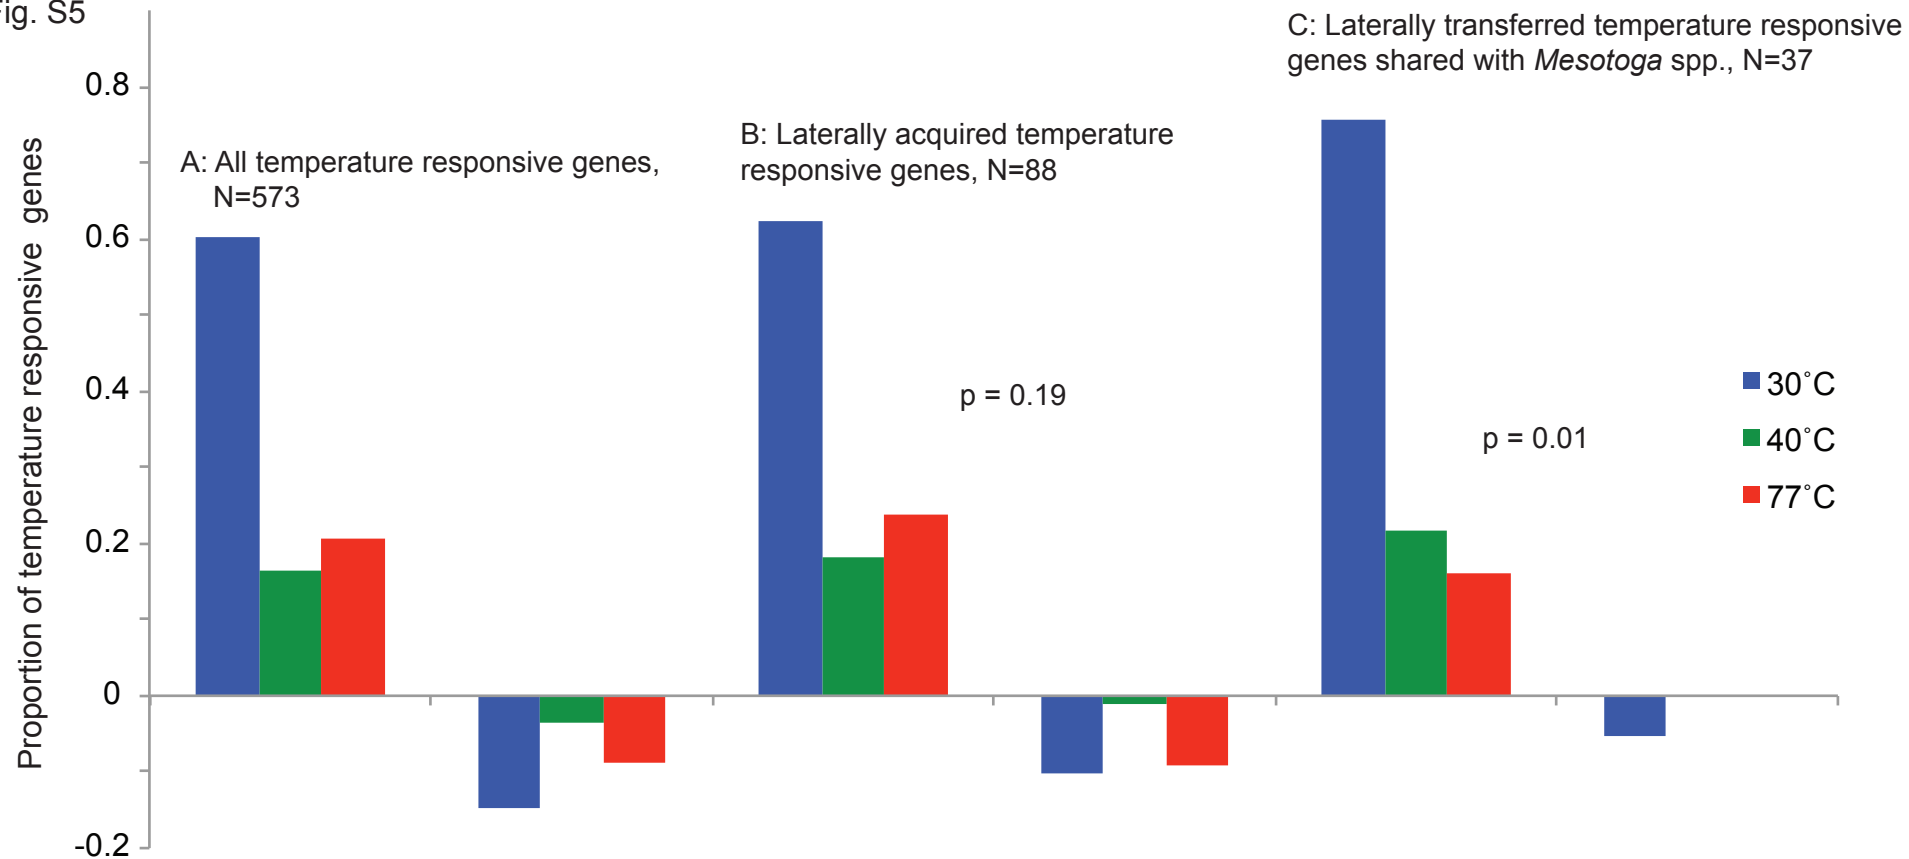

Fig. S6

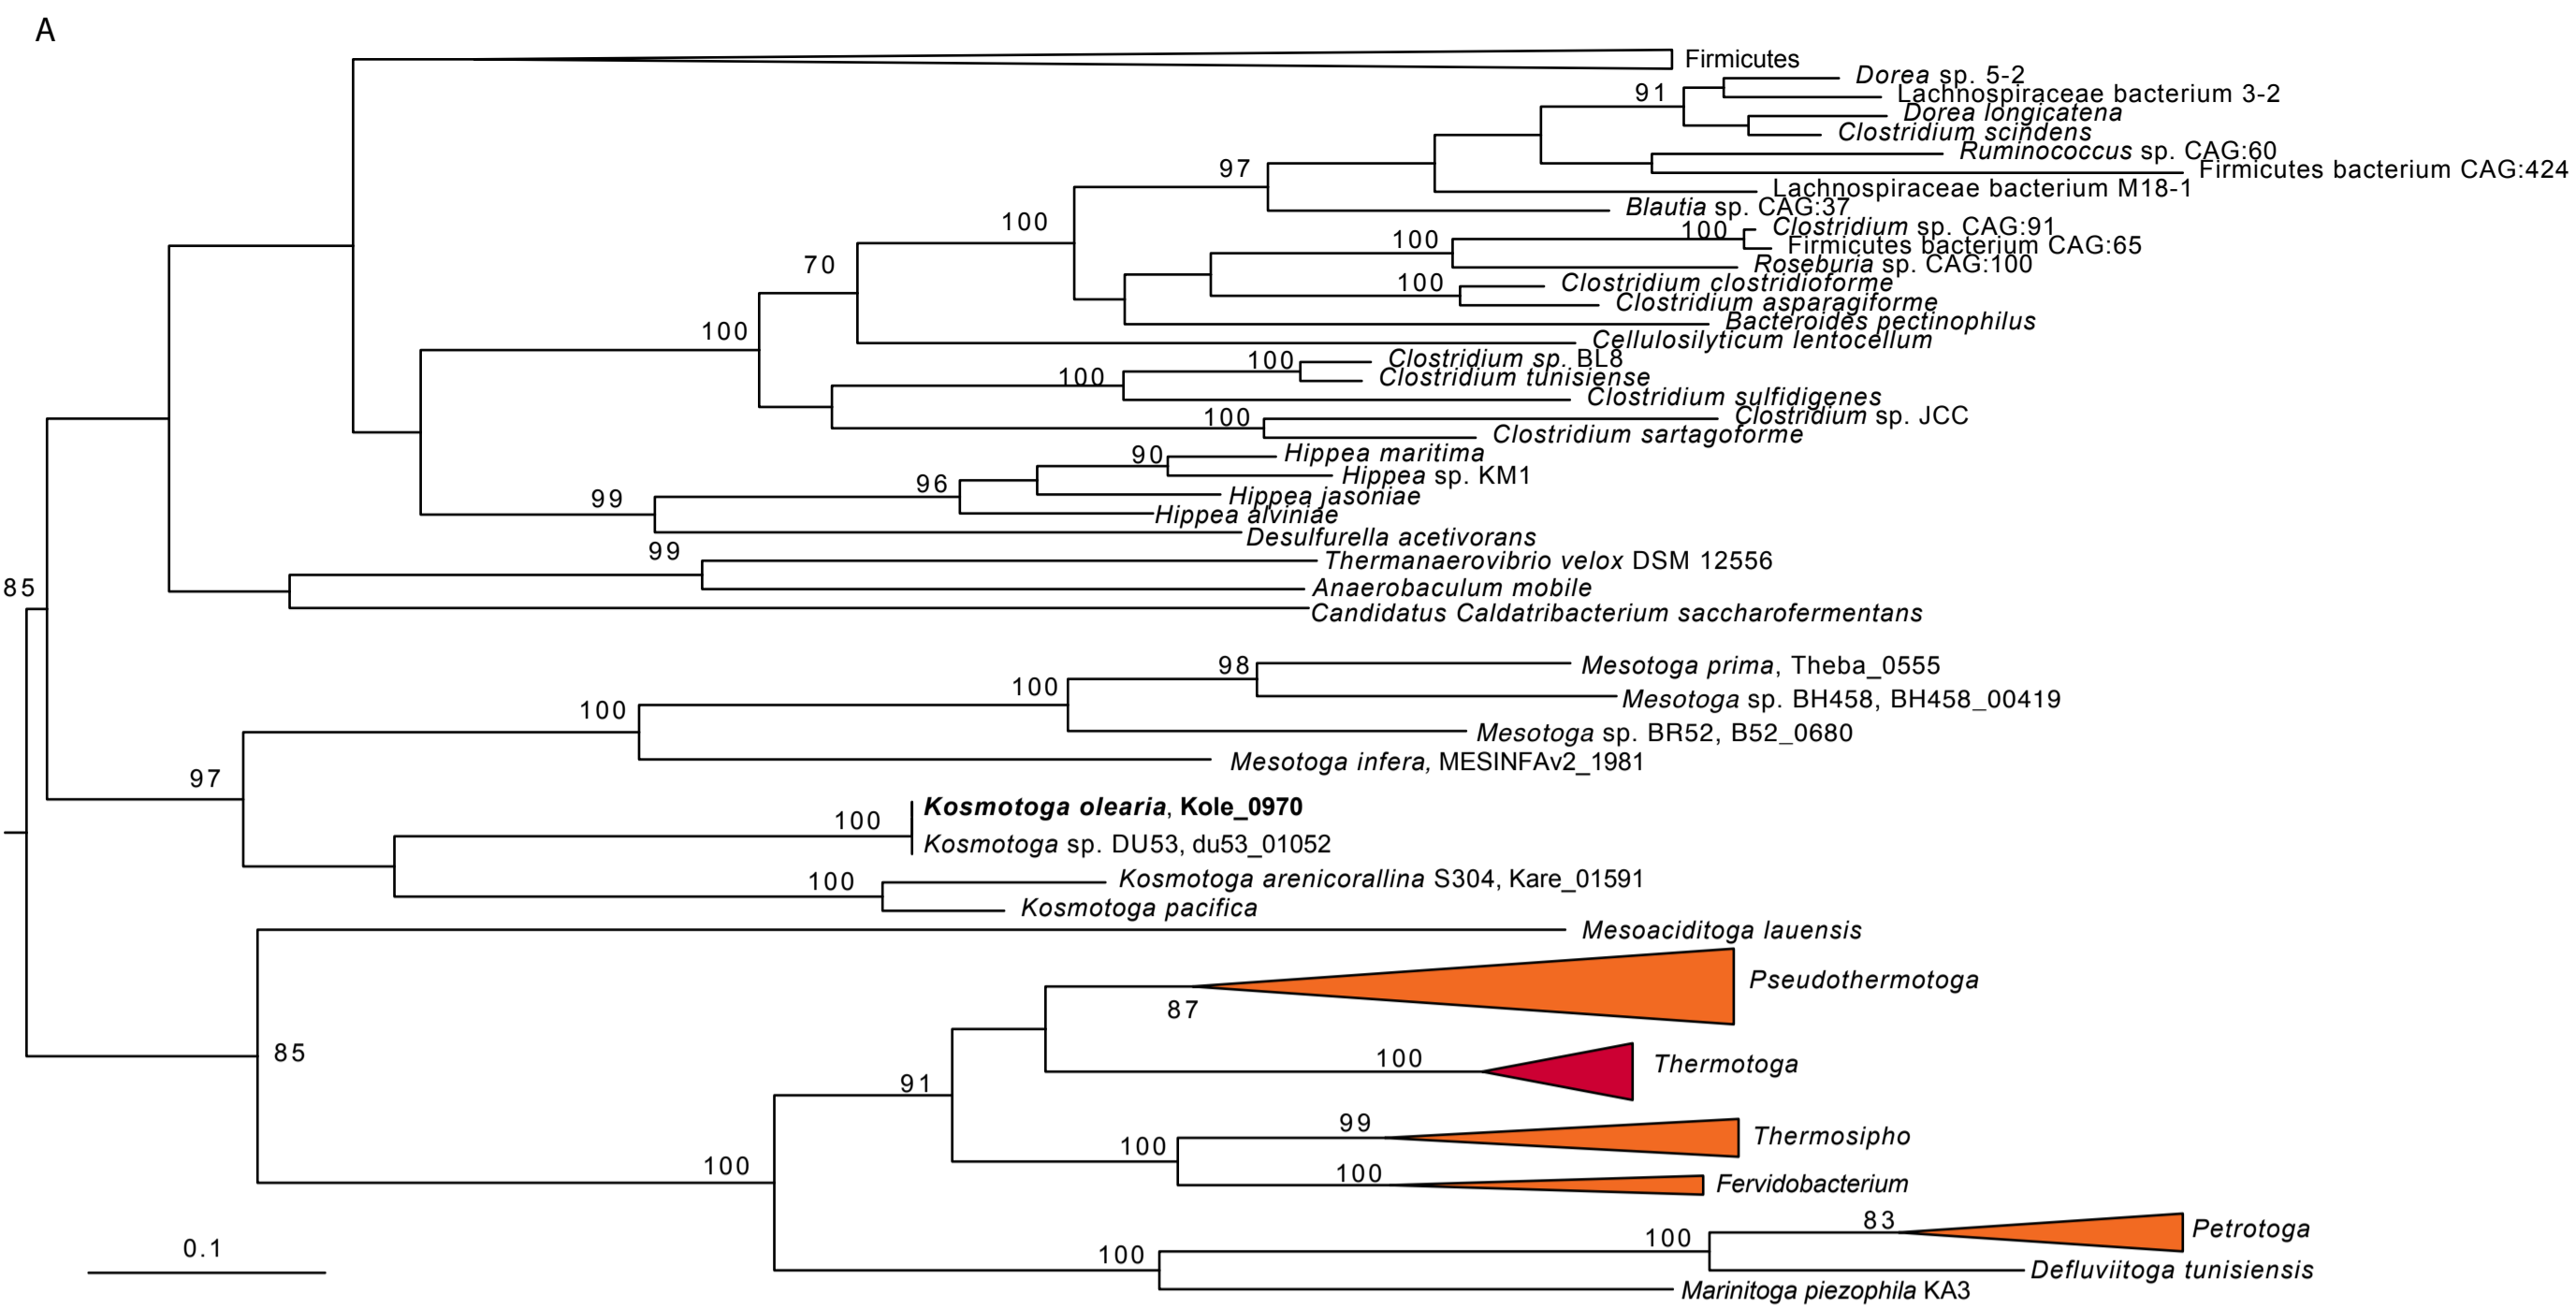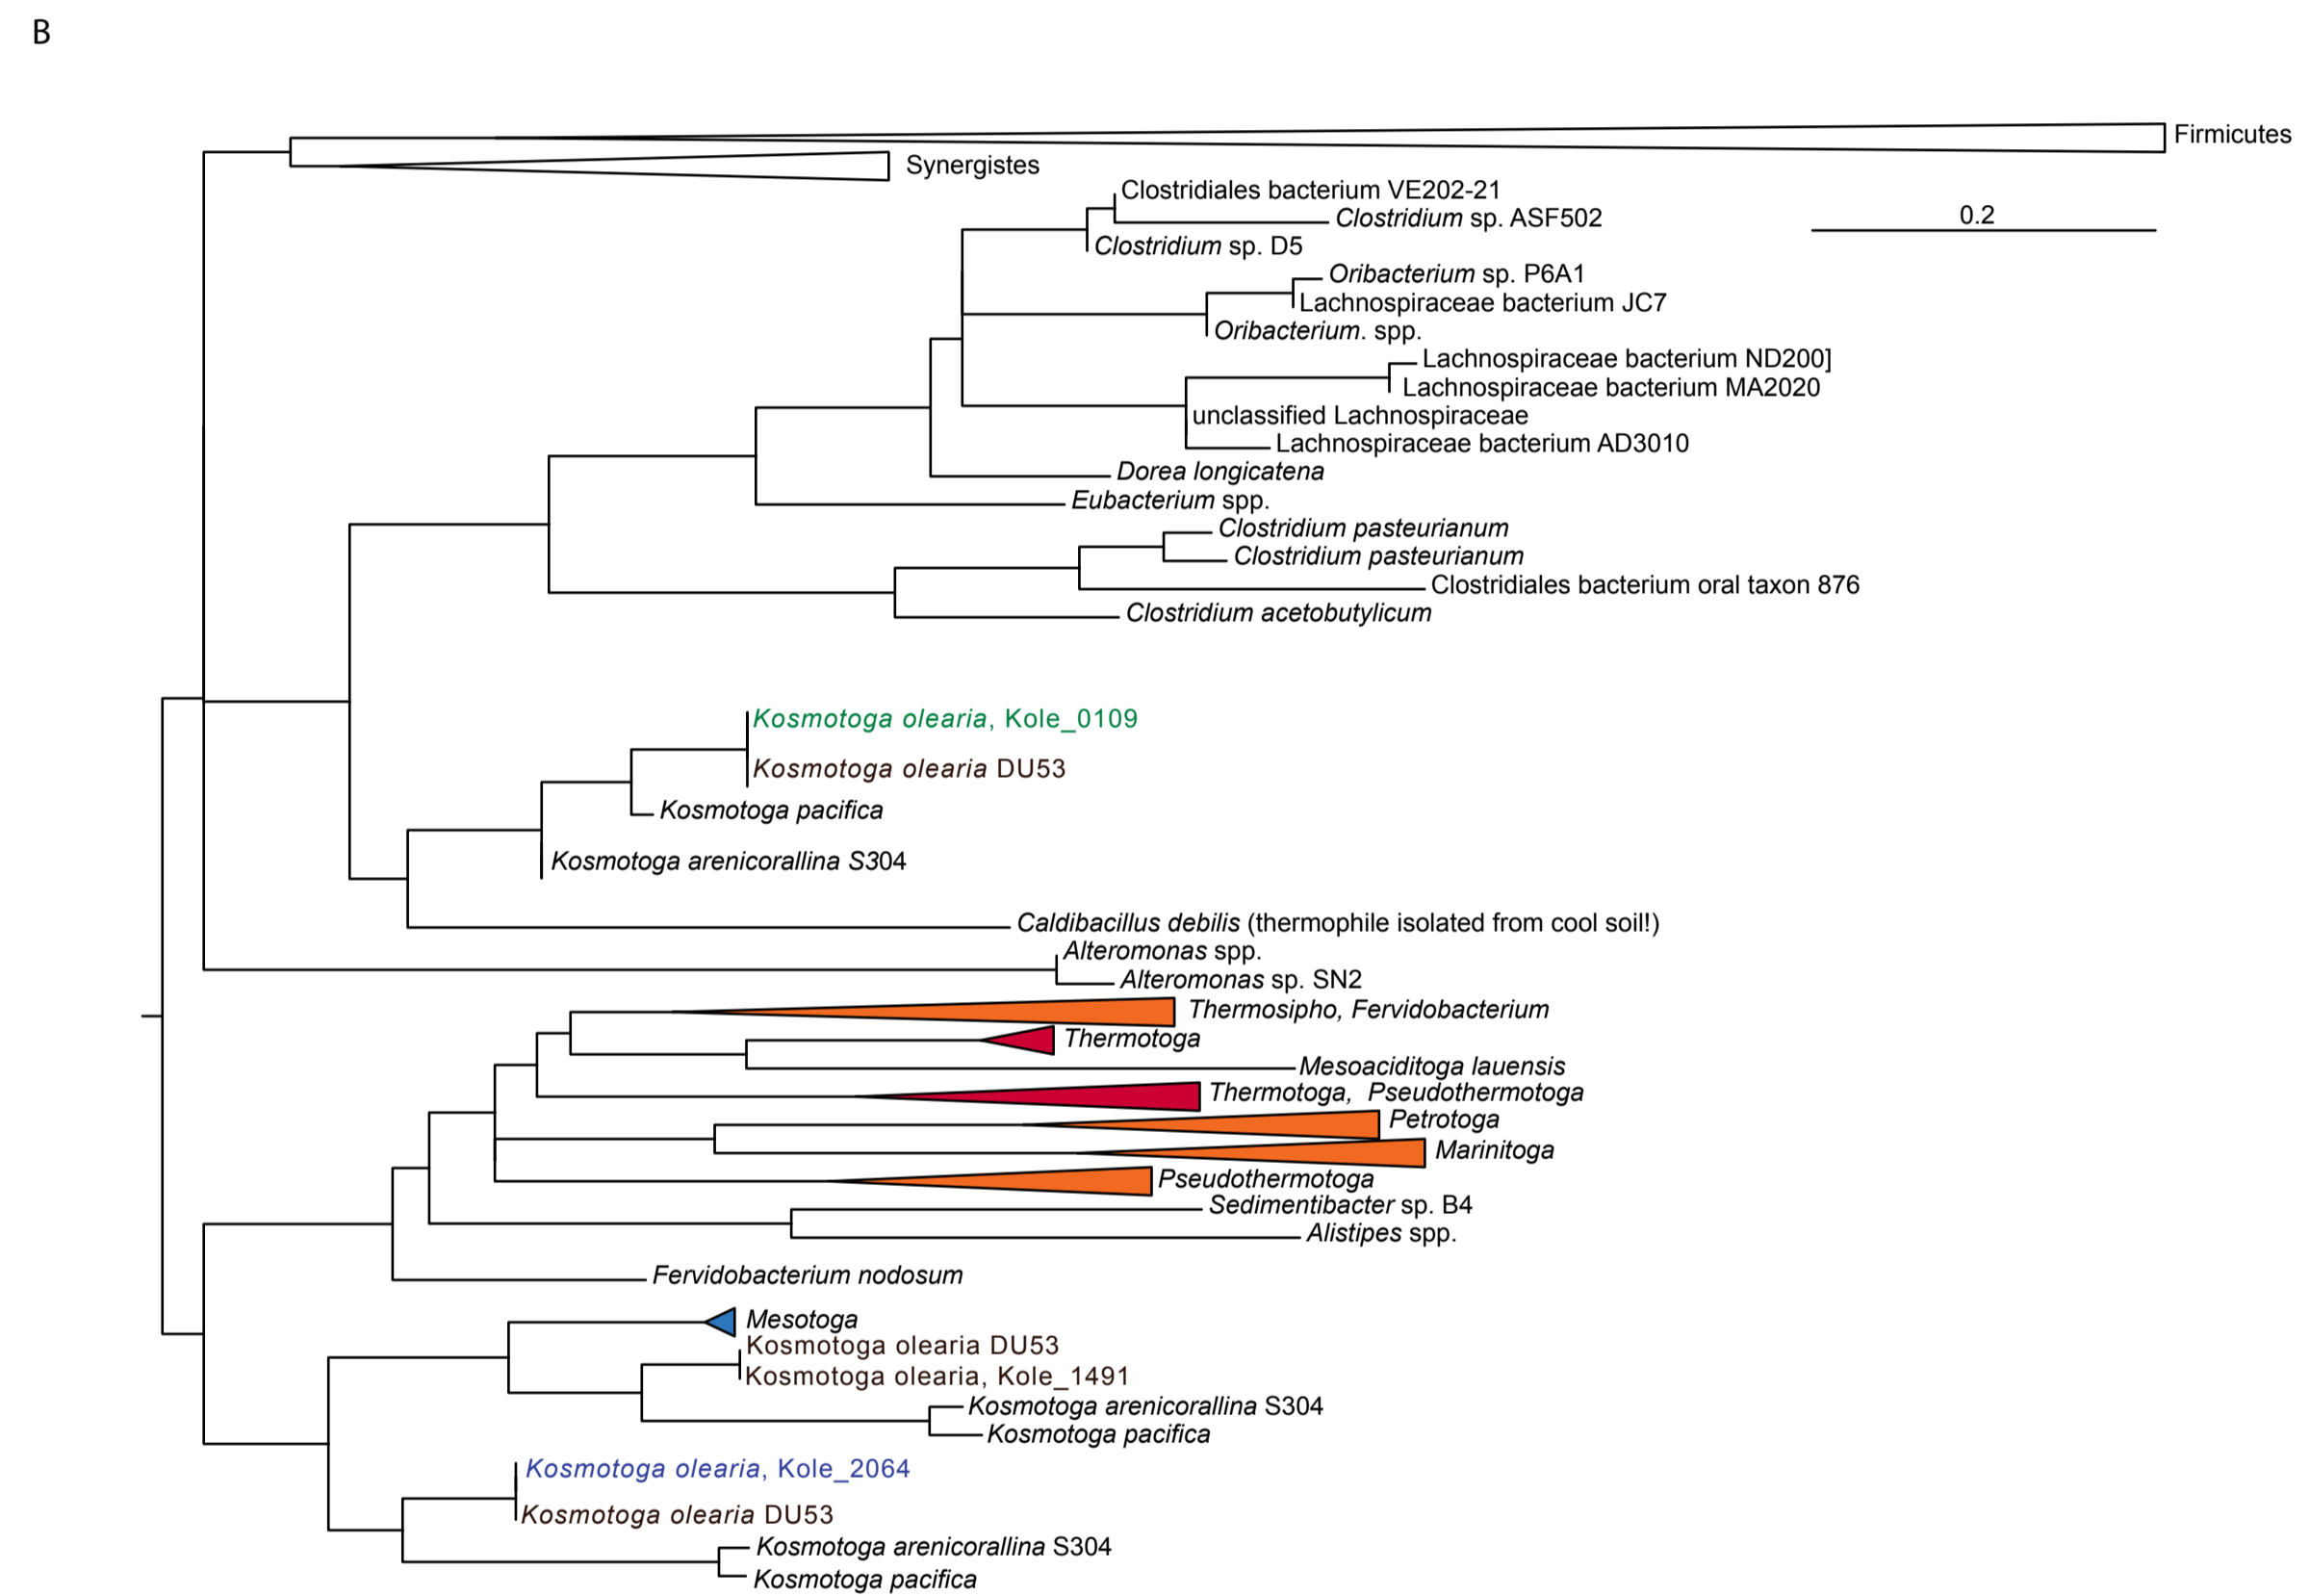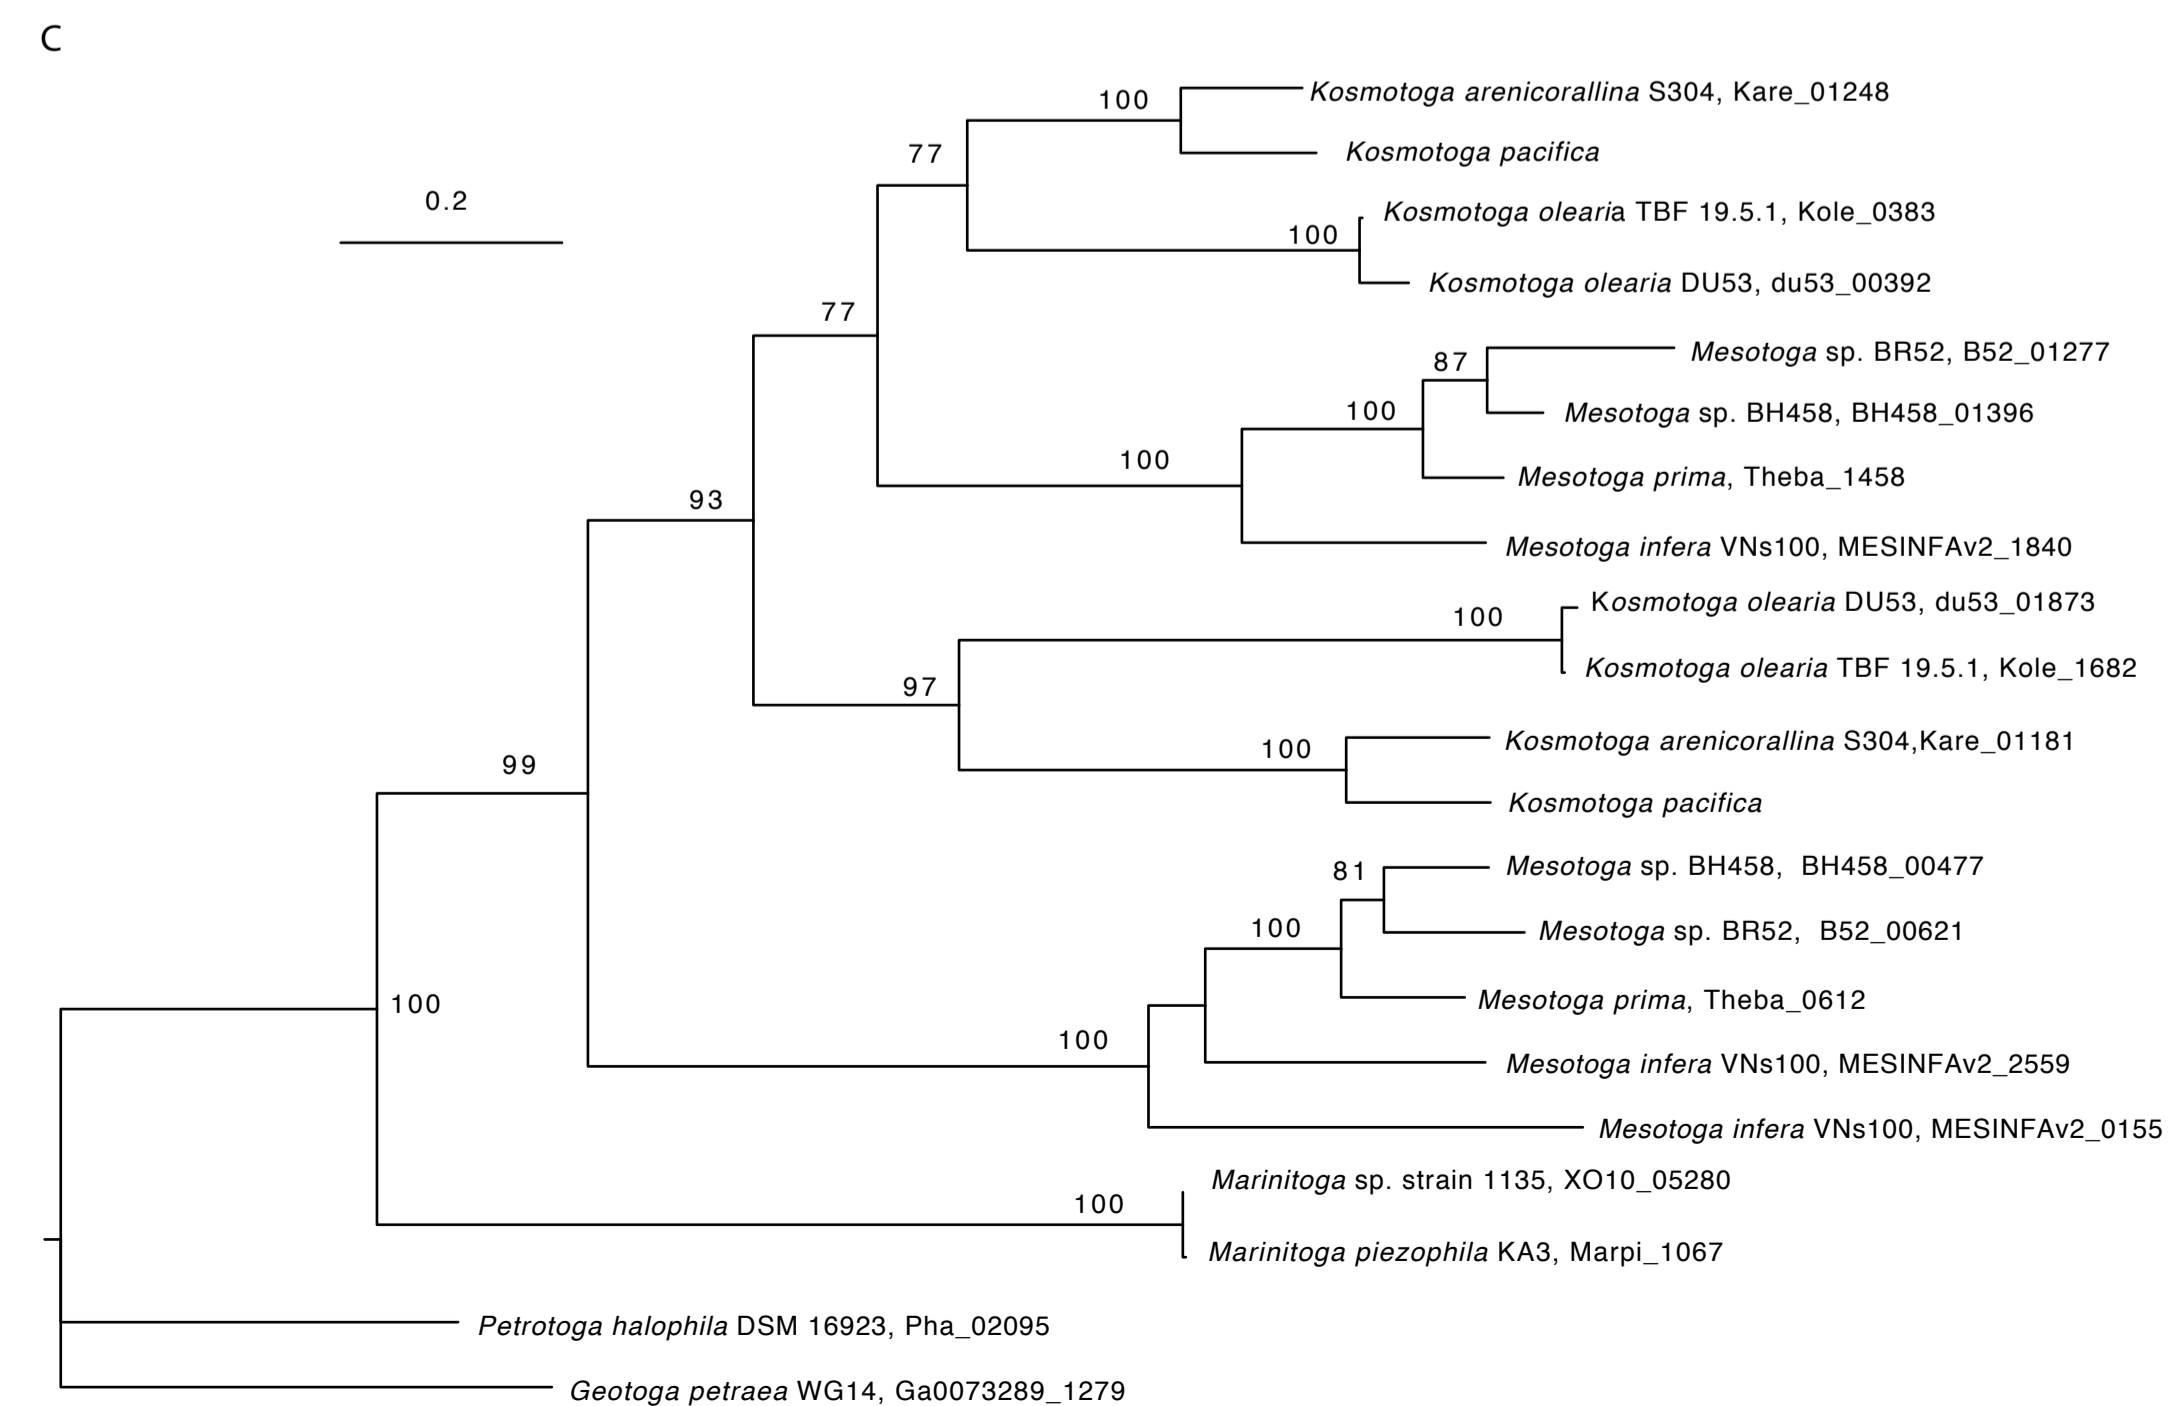

Supplement: 792_2017_956_MOESM2_ESM.pdf [file 792_2017_956_MOESM2_ESM.pdf]
